# Supplementary material
Source: PubMed Central journal article supplement (PMC3777415)

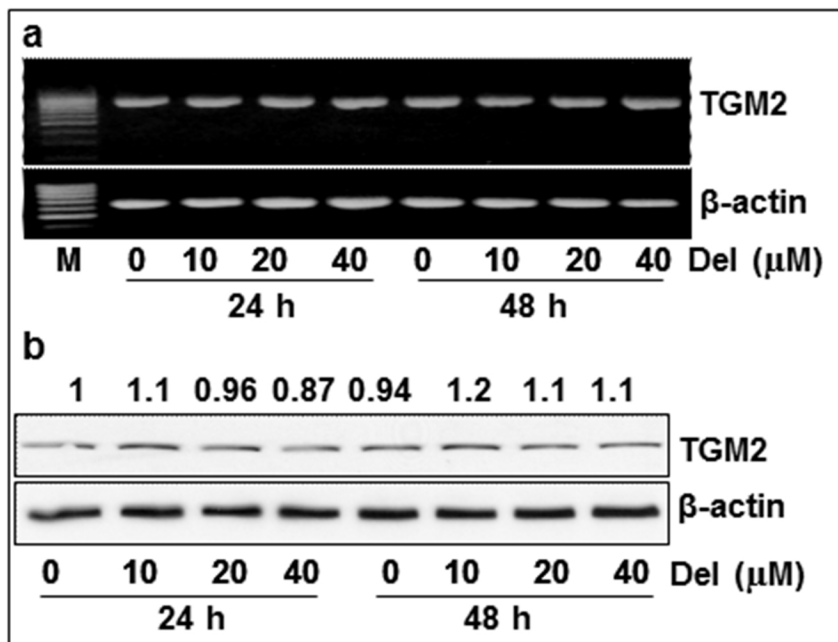

Supplementary figure 1

Supplement: NIHMS507372-supplement-Figure_S1.pdf [file NIHMS507372-supplement-Figure_S1.pdf]

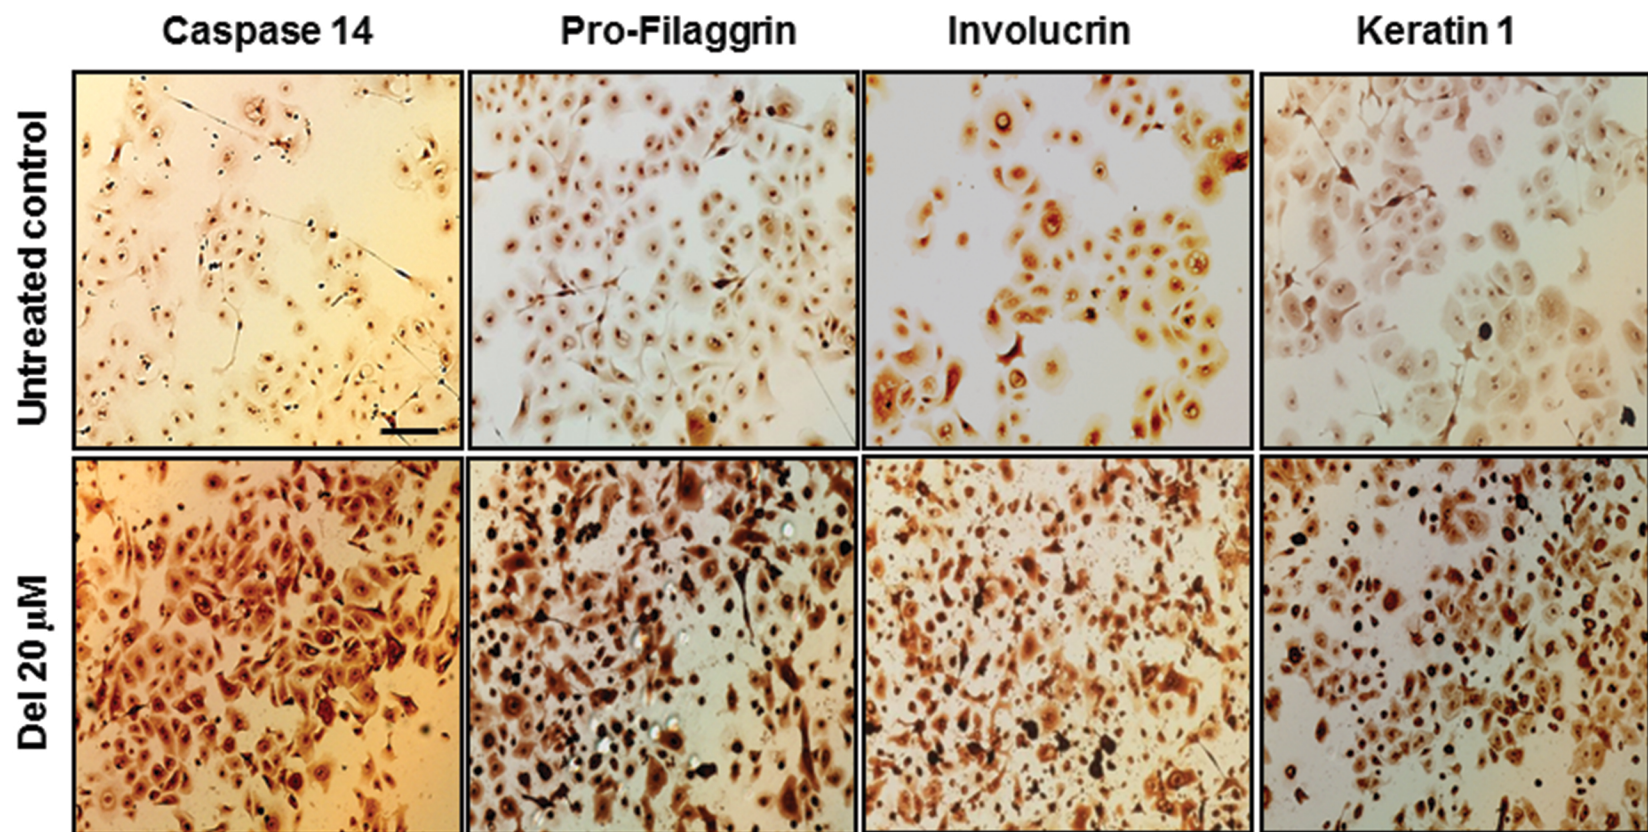

Supplementary figure 2

Supplement: NIHMS507372-supplement-Figure_S2.pdf [file NIHMS507372-supplement-Figure_S2.pdf]

Phase contrast   Annexin V   Propidium Iodide   Merged

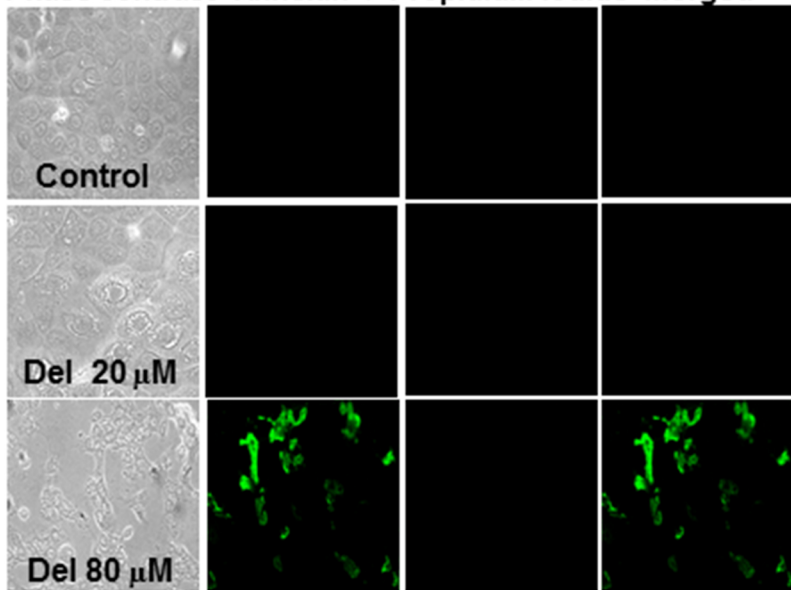

Supplement: NIHMS507372-supplement-Figure_S3.pdf [file NIHMS507372-supplement-Figure_S3.pdf]

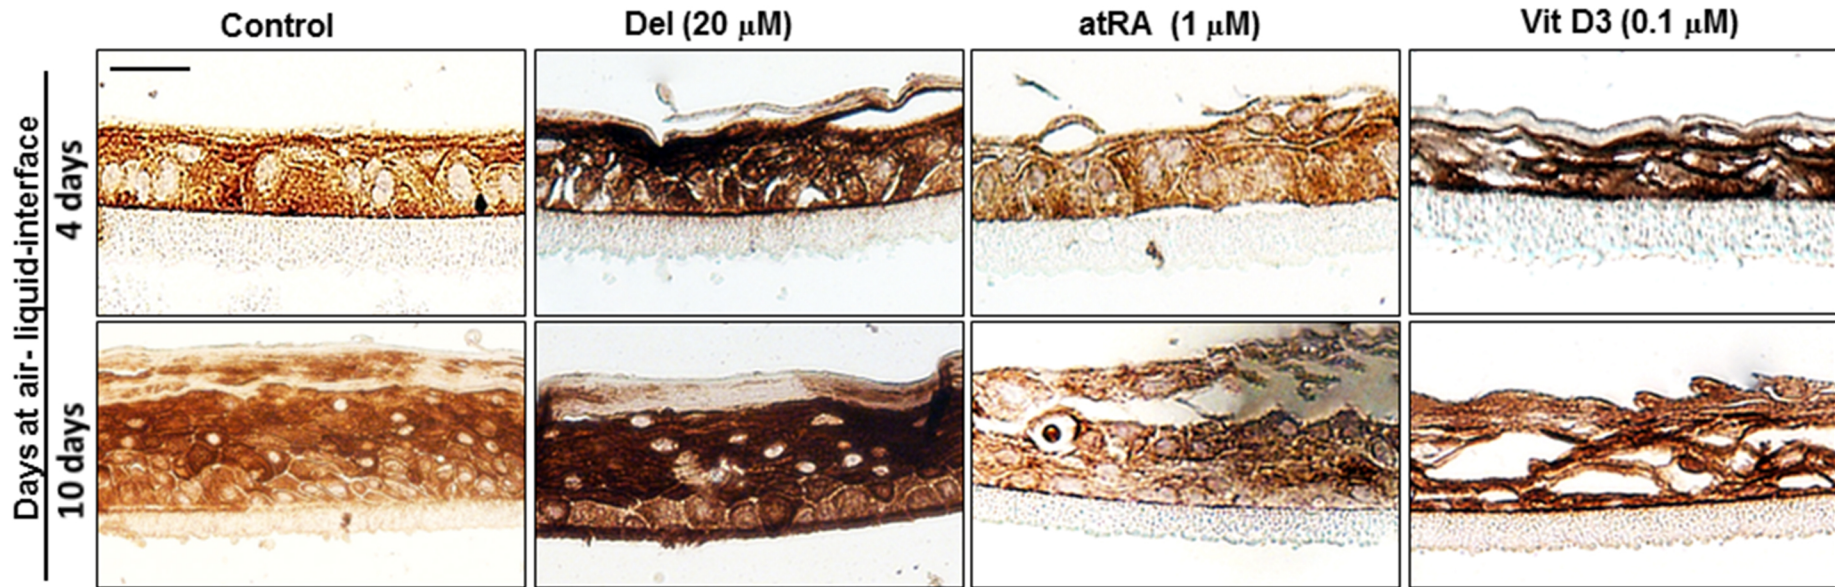

Supplementary Figure 4

*Chamcheu et al*

Supplement: NIHMS507372-supplement-Figure_S4.pdf [file NIHMS507372-supplement-Figure_S4.pdf]
